# Supplementary material for: A cross-sectional study on colorectal cancer screening knowledge and barriers among university students
Source: Springer Nature journal article supplement (doi:10.1186/s12889-025-22510-z), 2025-05-21
Supplement: MOESM1 [file 12889_2025_22510_MOESM1_ESM.pdf]

# A Cross-Sectional Study on Colorectal Cancer Screening Knowledge and Barriers Among Egyptian University Students

|                                                                                                                    |                                                                                                                                               |
|--------------------------------------------------------------------------------------------------------------------|-----------------------------------------------------------------------------------------------------------------------------------------------|
| Do you agree to participate with us in this survey?                                                                | Yes<br>No                                                                                                                                     |
| <b>Socio-demographic characteristics</b>                                                                           |                                                                                                                                               |
| Sex                                                                                                                | Male<br>Female                                                                                                                                |
| Age                                                                                                                |                                                                                                                                               |
| Faculty                                                                                                            |                                                                                                                                               |
| Academic year                                                                                                      | First<br>Second<br>Third<br>Fourth<br>Fifth<br>Sixth                                                                                          |
| Is there any Family history of GIT cell tumor                                                                      | Yes<br>No                                                                                                                                     |
| <b>Knowledge about Colorectal Cancer</b>                                                                           |                                                                                                                                               |
| Have you ever heard of colorectal cancer before?                                                                   | Yes<br>No                                                                                                                                     |
| What do you think is the most likely age to develop colon cancer?                                                  | Less than 20 years<br><br>20-30 years<br>31-40 years old<br>41-50 years old<br>50 years or older*                                             |
| Which of the following constitute Risk factors of colorectal cancer? ( <i>you can choose more than one</i> )       | Smoking<br><br>High fat diet<br>Aging<br>Medical history<br>Lack of physical activity<br>Obesity<br>Excessive intake of red or processed meat |
| Which of the following constitute Preventive factors of colorectal cancer? ( <i>you can choose more than one</i> ) | Dietary rich in fiber diet<br>Regular exercise<br>Maintain a healthy body weight<br>Stop smoking<br>Keep drinking water                       |

**Which of the following constitute Warning signs of colorectal cancer? (*you can choose more than one*)**

Blood in the stool  
Abdominal pain  
Anal pain  
Change in bowel function  
Abdominal distention  
Exhaustion  
Unexplained weight loss  
Yes\*

**Can colorectal cancer grow without obvious symptoms in the patient?**

No

**Is colorectal cancer a treatable disease if diagnosed early?**

Yes\*

**Are there available screening methods to diagnose colorectal cancer early?**

No

Yes\*

**Are the screening methods useful?**

No

Yes\*

No

**Which of the following procedures can be used in colorectal cancer screening? (*you can choose more than one*)**

colonoscopy

Fecal immunochemical test  
Fecal occult blood test  
Stool DNA test  
Flexible sigmoidoscopy  
CT colonography

**Practice & Perceived barriers regarding colorectal cancer**  
**Have you had a CRC screening before?**

Yes

No

**If yes, what type of screening did you do? (*you can choose more than one*)**

colonoscopy

Fecal immunochemical test  
Fecal occult blood test  
Stool DNA test  
Flexible sigmoidoscopy  
CT colonography

**If not, which of the following prevents you from taking it? (*you can choose more than one*)**

Financial burden and cost  
feel embarrassed

Fear of painful  
procedures  
Fear of results  
no recommendation  
from the healthcare  
providers

**\*Correct Answer**

## دراسة مقطعية حول معرفة وفهم فحص سرطان القولون والمستقيم والعوائق أمامه بين طلاب الجامعات

### المصرية

|                                                                      |                                                                                                                  |
|----------------------------------------------------------------------|------------------------------------------------------------------------------------------------------------------|
| الموافقة على المشاركة                                                | هل توافق على المشاركة معنا في هذا الاستبيان؟<br>-نعم<br>-لا                                                      |
| الخصائص الديموغرافية                                                 |                                                                                                                  |
| الجنس                                                                | -ذكر<br>-أنثى                                                                                                    |
| العمر                                                                | يرجى كتابة العمر بالأرقام                                                                                        |
| الكلية                                                               | يرجى ذكر اسم الكلية                                                                                              |
| السنة الدراسية                                                       | -الأولى<br>-الثانية<br>-الثالثة<br>-الرابعة<br>-الخامسة<br>-السادسة                                              |
| الهضمي؟                                                              | هل لديك تاريخ عائلي لأورام الجهاز الهضمي؟<br>-نعم<br>-لا                                                         |
| المعرفة حول سرطان القولون والمستقيم                                  |                                                                                                                  |
| والمستقيم من قبل؟                                                    | هل سمعت عن سرطان القولون والمستقيم من قبل؟<br>-نعم<br>-لا                                                        |
| ما هو العمر الأكثر عرضة للإصابة بسرطان القولون؟                      | -أقل من ٢٠ عامًا<br>-من ٢٠ إلى ٣٠ عامًا<br>-من ٣١ إلى ٤٠ عامًا<br>-من ٤١ إلى ٥٠ عامًا<br>-50 عامًا أو أكثر*      |
| ما هي عوامل الخطر لسرطان القولون؟ (يمكنك اختيار أكثر من خيار)        | -التدخين<br>-النظام الغذائي الغني بالدهون<br>-التقدم في العمر<br>-التاريخ الطبي<br>-قلة النشاط البدني<br>-السمنة |
| ما هي العوامل الوقائية من سرطان القولون؟ (يمكنك اختيار أكثر من خيار) | -الإكثار من اللحوم الحمراء أو المصنعة<br>-التمارين الرياضية المنتظمة<br>-الحفاظ على وزن صحي                      |

- الإقلاع عن التدخين
- شرب الماء بانتظام
- وجود دم في البراز
- ألم في البطن
- ألم في الشرج
- تغير في وظيفة الأمعاء
- انتفاخ في البطن
- إرهاق
- فقدان وزن غير مبرر

ما هي العلامات التحذيرية لسرطان القولون؟ (يمكنك اختيار أكثر من خيار)

هل يمكن أن ينمو سرطان القولون دون ظهور أعراض واضحة لدى المريض؟

هل يعتبر سرطان القولون مرضًا قابلاً للعلاج إذا تم تشخيصه مبكرًا؟

هل تتوفر طرق للفحص المبكر عن سرطان القولون؟

هل تعتبر طرق الفحص مفيدة؟

- تنظير القولون
- اختبار الدم المناعي للبراز
- اختبار الدم الخفي في البراز
- اختبار الحمض النووي للبراز
- التنظير السيني
- التصوير المقطعي للقولون

ما هي الطرق المتاحة لفحص سرطان القولون؟ (يمكنك اختيار أكثر من خيار)

#### الممارسات والعوائق المدركة

هل سبق وأن أجريت فحصًا لسرطان القولون؟

- تنظير القولون
- اختبار الدم المناعي للبراز
- اختبار الدم الخفي في البراز
- اختبار الحمض النووي للبراز
- التنظير السيني
- التصوير المقطعي للقولون

إذا كانت الإجابة نعم، ما هو نوع الفحص الذي أجريته؟ (يمكنك اختيار أكثر من خيار)

- العبء المالي والتكلفة
- الشعور بالإحراج
- الخوف من الإجراءات المؤلمة
- الخوف من النتائج

إذا كانت الإجابة لا، ما الذي يمنعك من إجراء الفحص؟

-عدم وجود توصية من مقدمي الرعاية  
الصحية

\* الاجابة الصحيحة.
